# Supplementary material
Source: PubMed Central journal article supplement (PMC2772742)
Supplement: supp_29_21_5710__1.pdf [file supp_29_21_5710__1.pdf]

Liu et al. Supplemental Fig. 1

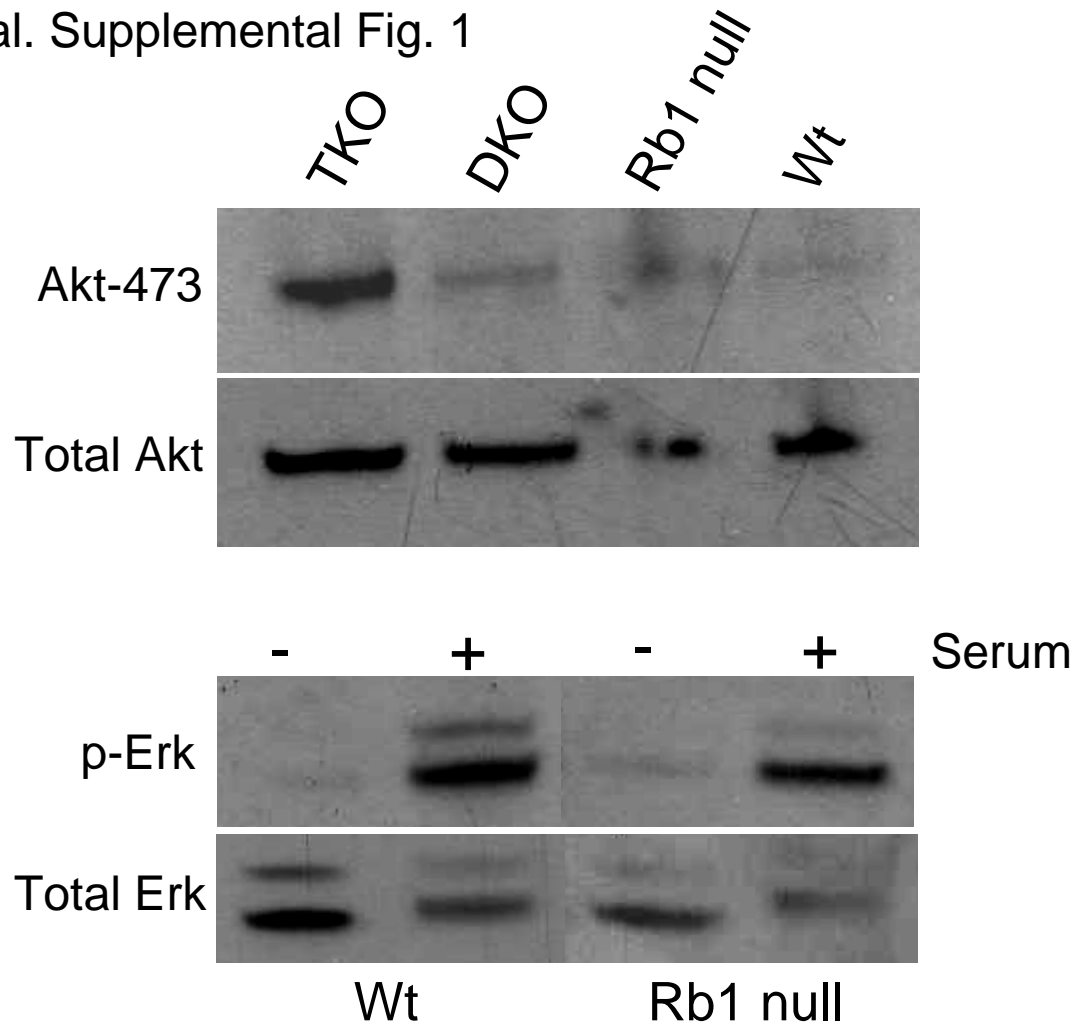

Supplemental Fig. 1. The top panel shows an Akt-473 Western blot of TKO, DKO (RbL1<sup>-/-</sup>, RbL2<sup>-/-</sup>) and Rb1<sup>-/-</sup> MEFs. The lower panel shows a Western blot for phospho-Erk. Cells were serum-starved for 24 hrs. (-) followed by a one hr serum stimulation (10% FBS) (+). Wt, is wild-type MEFs.

Liu et al Supplemental Fig. 2

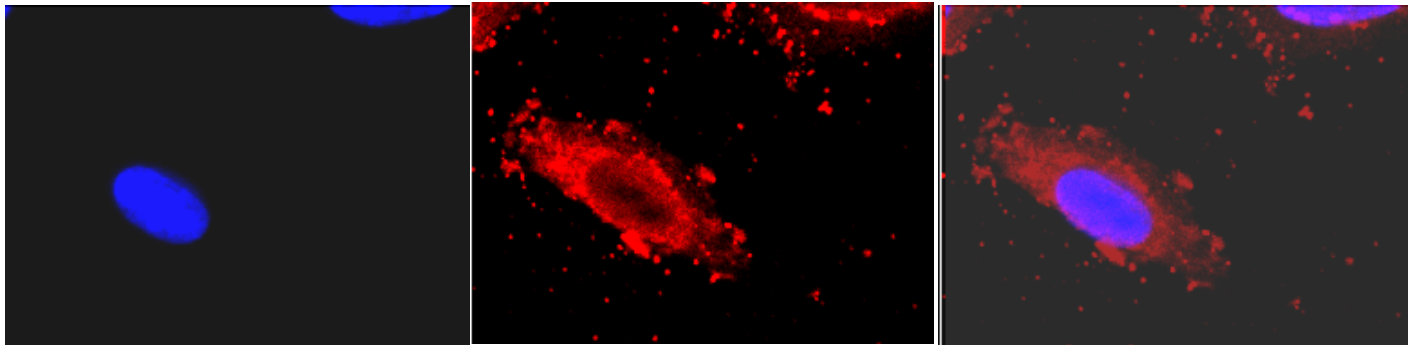

Supplemental Fig. 2. Immunostaining for Akt-473 in TKO MEFs at low density. Dapi nuclear staining is shown on the left, Akt-473 in the center and a merged image is shown on the right.

El-Naggar et al Supplemental Table 1

| <b>Name</b>                   | <b>IgG</b>        | <b>Specificity</b> | <b>Maker</b>             |
|-------------------------------|-------------------|--------------------|--------------------------|
| Anti-Akt 1/2/3 (H-136)        | Rabbit polyclonal | m, rat, h          | Santa Cruz Biotechnology |
| Anti-pAkt 1/2/3 (Ser473)      | Rabbit polyclonal | m, rat, h          | Santa Cruz Biotechnology |
| Anti-pAkt 1/2/3 (Thr308)      | Rabbit polyclonal | m, rat, h          | Santa Cruz Biotechnology |
| Anti-pAkt ser473              | Rabbit monoclonal | m, rat, h          | cell signaling           |
| Anti-mTOR (FRAP, H-266)       | Rabbit monoclonal | m, rat, h          | Santa Cruz Biotechnology |
| Anti-Raf-1 E-10               | mouse monoclonal  | m, rat, h          | Santa Cruz Biotechnology |
| Anti-pRaf (ser 259)           | Rabbit monoclonal | m, rat, h          | Santa Cruz Biotechnology |
| Anti-Foxo3a (FKHRL1,D-12)     | mouse monoclonal  | m, rat, h          | Santa Cruz Biotechnology |
| Anti-pFoxo3a (pFKHRL, thr 32) | Rabbit monoclonal | m, rat, h          | Santa Cruz Biotechnology |
| Anti-pHLpp1                   | Rabbit polyclonal | m, rat, h          | Belly Laboratories       |
| Anti-pERK1/2                  | Rabbit polyclonal | m, rat, h          | Cell Signaling           |
| Anti-MEK                      | Rabbit polyclonal | m, rat, h          | Cell Signaling           |
| Anti-pMEK                     | Rabbit polyclonal | m, rat, h          | Cell Signaling           |
| Anti-beta-actin               | mouse monoclonal  | m, rat, h          | sigma                    |

| Primer name  | Sequence (5' - 3')          | Tm °C | Amplicon (bp) |
|--------------|-----------------------------|-------|---------------|
| Mm ARF LP    | TGAGGCTAGAGAGGATCTTGAGA     | 56.3  | 91            |
| Mm ARF RP    | GCAGAAGAGCTGCTACGTGAA       | 57.3  |               |
| Mm ACTB_2 LP | GGCTGTATTCCCCTCCATCG        | 57.6  | 154           |
| Mm ACTB_2 RP | CCAGTTGGTAACAATGCCATGT      | 55.9  |               |
| Mm mTOR LP   | ACTGAGGAGGGAGAACAGCA        | 57.9  | 153           |
| Mm mTOR RP   | TGGCTCCATCTGCTAGTGTG        | 56.8  |               |
| Mm Sin1 LP   | GTACTIONTTGGCCCTGGTTGAA     | 55.3  | 203           |
| Mm Sin1 RP   | CTTCTCCAGGCGGTACTIONTACTGAG | 57    |               |
| Mm Raptor LP | CCGAGGAGCATGACCTAGAG        | 56.6  | 233           |
| Mm Raptor RP | CTCCCAGTCCCAAAAACAGA        | 54.7  |               |
| Mm PHLPP1 LR | AGAAACTTGGTGGTGCTGCT        | 57.3  | 229           |
| Mm PHLPP1 RP | ACTCCATTGACCTTGCCATC        | 55.1  |               |
| Mm PHLPP2 LR | ACGTTCTCTGTGCGAAATGG        | 54.9  | 164           |
| Mm PHLPP2 RP | AGGAAGGTGTAGCCCAGGAT        | 57.8  |               |
| Mm c-Myc LP  | TCCTGTACCTCGTCCGATTC        | 55.9  | 195           |
| Mm c-Myc RP  | GGTTTGCCCTTTCTCCACAG        | 55.8  |               |
| Mm FOXO3a LP | TTCAAGGATAAGGGCGACAG        | 54.5  | 211           |
| Mm FOXO3a RP | GGCTCTTGGTGTACTTGTGTC       | 56.5  |               |
| Mm Ccnd1 LP  | GCGTACCCTGACACCAATCTC       | 57.7  | 183           |
| Mm Ccnd1 RP  | CTCCTCTTCGCACTTCTGCTC       | 57.6  |               |
| Mm mLST8 LP  | AGTCTTCCATCACGTCTGCTC       | 56.6  | 168           |
| Mm mLST8 RP  | ATTGCAGGGCATAGCGTGT         | 57.5  |               |
| Mm Ccne1 LP  | GTGGCTCCGACCTTTCAGTC        | 62.5  | 101           |
| Mm Ccne1 RP  | CACAGTCTTGTCAATCTTGGCA      | 60.8  |               |
| Mm Ccna1 LP  | TGATGCTTGTCAAATGCTCAGC      | 61.7  | 101           |
| Mm Ccna1 RP  | AGGTCCTCCTGTACTGCTCAT       | 61.8  |               |
| Mm cdc2 LP   | AGAAGGTACTIONTACGGTGTGGT    | 60.2  | 128           |
| Mm cdc2 RP   | GAGAGATTTCCCGAATTGCAGT      | 60.4  |               |
| Mm Rictor LP | TCTGTGCGTTTACAGGTTGTTG      | 60.02 | 193           |
| Mm Rictor RP | GCTTCCTTTGCTTTGTCCAG        | 59.99 |               |
